# Supplementary material
Source: publisher figshare collection journal article supplement (https://brill.figshare.com/articles/dataset/_/26104735)
Supplement: Supplementary file 1 [file 1]

REVIEW ARTICLE

**A bibliographic account on entomophagy in India: past records, recent trends and future prospects (1945-2023)**

*P. Bhadra, N. Muni, S. Borah and J. Chakravorty\**

Biochemistry and Nutritional Biology Laboratory, Department of Zoology, Rajiv

Gandhi University, Rono Hills, Itanagar, Arunachal Pradesh, 791112, India;

[\\*jharna.chakraborty@rgu.ac.in](mailto:*jharna.chakraborty@rgu.ac.in)

**Supplementary material**

TABLE S1    Publication on entomophagy by Indian authors/entomophagy in India (non-Scopus + Scopus data)
