# Supplementary material
Source: publisher figshare collection journal article supplement (https://brill.figshare.com/articles/dataset/_/26104735)
Supplement: Supplementary file 1 [file 1]

## Sheet: TABLE S1
TABLE S1. Publication on entomophagy by Indian authors/entomophagy in India (non-Scopus + Scopus data)
S.No.	Title	Journal/ Book/ Any other source	Year	Author(s)	Category of Publications							State/UT	Publishers	Hyperlinks/DOI
					Nutrition	Review	Documentation	Analysis	History/Culture	Scientific Writing	Others
1	Locust as food and manure.	Indian Farming, 8, pp. 412	1945	Das, S.	YES							New Delhi	NA	NA
2	Chemical Composition and Nutritional Evaluation of Spent Silk Worm Pupae.	Journal of Agricultural and Food Chemistry, 42, pp 2201- 2203.	1994	Rao P. U.	YES							Andhra Pradesh	ACS Publications	DOI: 10.1021/jf00046a023
3	Uses of insects as human food in Papua New Guinea, Australia, and North-East India: Cross-cultural considerations and cautious conclusions.	Ecology of Food and Nutrition, 36(2-4), 159-185.	1997	Meyer Rochow, V. B., & Changkija, S.						YES		Nagaland	Taylor & Francis	https://doi.org/10.1080/03670244.1997.9991513
4	A review of chitin and chitosan applications	Reactive and Functional Polymers, 46: 1-27.	2000	Majeti, N.V. & Kumar, R.		YES						Uttarakhand	ELSEVIER	https://doi.org/10.1016/S1381-5148(00)00038-9
5	Insect pests as human food of tribals in North Eastern Region of India.	Indian Journal of Entomology, 2000, Vol. 62 (1), 97-100, ref. 3	2000	Pathak, K. A., & Rao, K. R.			YES					Andhra Pradesh	Entomological Society of India	NA
6	Nutritive value of non-mulberry and mulberry silkworm pupae and consumption pattern in Assam, India. ( Cited by 104)	Nutrition Research, 23(10), 1303-1311.	2003	Mishra, N., Hazarika, N. C., Narain, K., & Mahanta, J.	YES							Assam	ELSEVIER	https://doi.org/10.1016/S0271-5317(03)00132-5
7	Utilization of insects as human food in Nagaland.	Indian Journal of Entomology, 2004, Vol. 66, No. 4, 308-310 ref. 5	2004	Ao, M. A., & Singh, H. K			YES					Nagaland	Entomological Society of India	NA
8	Traditional food insects and spiders in several ethnic groups of Northeast India, Papua New Guinea, Australia, and New Zealand.	Ecological implications of mini livestock-potential of insects, rodents, frog and snail, 389-414.	2005	Meyer-Rochow, V. B.							YES(Book chapter)	EXCEPTIONAL	Science Publishers Enfiel, USA
9	Utilization of termite, Odontotermes formosanus by tribes of South India in medicine and food	Indian Journal of Natural Products and Resources,V- 4(2)	2005	Wilsanand, V.		YES						Kerala	CSIR	http://nopr.niscair.res.in/handle/123456789/8072
10	Insects as human food with special reference to Assam and Northeast India.	Asian Agri-History (India), 9(2).	2005	Deva Nath, H. K., Gogoi, R., & Gogoi, G.			YES					Assam	Asian Agri-History Foundation	https://agris.fao.org/search/en/providers/122648/records/64724a6753aa8c8963054fda
11	Coleopterans as food: a case study of ethnic tribes in Arunachal Pradesh, North Eastern India	National seminar on recent advances in life sciences, Deptt. of Life sciences, Manipur University, Imphal	2007	Singh Tarun Kumar O. Chakravorty J. and Kato D.							YES (Seminar)	Arunachal Pradesh	NA	NA
12	Edible insects of Nyishi tribe of Arunachal Pradesh	NA	2007	Singh OT, Nabam S, Chakravorty J.							YES	Arunachal Pradesh	NA	NA
13	Therapeutics of insects and insect products in S.Indian traditional medicine	Indian Journal of Traditional Knowledge 6(4):563-568	2007	Wilsanand V., Varghese P. and Rajitha P.			YES					India-Kerala	CSIR	http://nopr.niscair.res.in/handle/123456789/1001
14	Peculiar Palate	Horizon, The Assam Tribune	2008	Hazarika, R.							YES	Assam	Academy Publisher	NA
15	Bioprospecting With Reference to Medicinal Insects and Tribes in India: An Overview.	The Indian Forester, pp. 1575-1591	2008	Senthilkumar, N., Nizara D. Barthakur, and Rao, M. L.		YES						Andhra Pradesh	Forest Research Centre, Hyderabad	http://environmentportal.in/files/The%20Indian%20Forester%203.pdf
16	Entomophagy and Coprophagy in undifferentiated Schizophrenia	Indian Journal of Psychological Medicine, V-31 (1)	2009	.Lingeswaran, A., Vijayakumar, V., & Dinesh, J.							YES (Case Report)	Tamil Nadu	Wolters Kluwer Health Co.	https://doi.org/10.4103/0253-7176.53318
17	Entomophagy, an ethnic culture attribute can be exploited to control increased insects population due to global climate change;	In International Human Dimensions Programme, Seventh International Science Conference on Human Dimensions of Global Environmental Change, held at Bonn, Germany (pp. 26-30)	2009	Jharna Chakravorty							YES (A case study)	Arunachal Pradesh	Center of biodiversity, deptt. of zoology, Rajiv Gandhi University, Rono Hills, Arunachal Pradesh	NA
18	Ethnozoology of Galo tribe with special reference to edible insects in Arunachal Pradesh	Indian Journal of Traditional Knowledge, 8(1),pp.81-83	2009	Kato Dagyom and G.V. Gopi					YES			Arunachal Pradesh	CSIR	http://nopr.niscair.res.in/handle/123456789/2976
19	Traditional insects bioprospecting- As Human Food and Medicine	Indian Journal of Traditional Knowledge, V-8 (4), pp. 485-494	2009	Srivastava S.K., Babu Naresh and Pandey Hema		YES						India-Odisha	National Institute of Science Communication and Information Resources (NISCAIR)	http://nopr.niscair.res.in/bitstream/123456789/6263/1/IJTK%208%284%29%20485-494.pdf
20	A review on the fascinating world of insect resources - reason for thoughts.	Psyche: A Journal of Entomology; Vol. 70, pp. 1-11. article ID 207570.	2010	Lokeshwari RK, Shantibala T.		YES						Manipur	Cambridge Entomological Club	https://doi.org/10.1155/2010/207570
21	Edible insects and their conservation strategy in Karbi Anglong district of Assam, North East India	The Bioscan	2010	R Ronghang, R Ahmed			YES					Assam	National Environmentalists Association	https://www.semanticscholar.org/paper/EDIBLE-INSECTS-AND-THEIR-CONSERVATION-STRATEGY-IN-Ronghang-Ahmed/01d89bae32f8639d85b5a9d374ed6396ca467483
22	An investigation on edible insects and their role in Socioeconomic development of rural communities, a case study on Edible insects of Dhemaji District of Assam (India).	Social Science Researcher, 1(1), 1-11.	2011	Doley, A. K., & Kalita, J							YES (A Case Study	Assam	North Lakhimpur College	NA
23	Assessment of the nutritive value of some wild edible insects of Meghalaya, North East India.	Journal of Entomological Research, 35(4), 353-358.	2011	Paul, D., & Dey, S	YES							Meghalaya	Malhotra Publishing House	NA
24	Nutrient content of sexual and worker forms of the subterranean termite, Reticulitermes sp.	Indian Journal of Traditional Knowledge, 10 (3), 505-507	2011	Paul, D., & Dey, S.	YES							Meghalaya	CSIR-NIScPR	https://nopr.niscpr.res.in/bitstream/123456789/12030/1/IJTK%2010%283%29%20505-507.pdf
25	Energy-efficient food production to reduce global warming and ecodegradation: The use of edible insects.	Renewable and sustainable energy reviews, 15(9), 4357-4360.	2011	Premalatha, M., Abbasi, T., Abbasi, T., & Abbasi, S. A		YES						Tamil Nadu	ELSEVIER	https://doi.org/10.1016/j.rser.2011.07.115
26	Entomophagy and human food security	International Journal of Tropical Insect Science	2011	R.T. Gahukar		Yes						Maharashtra	Cambridge University Press	doi:10.1017/S1742758411000257
27	A study on Edible insects used by the tea tribes in Greater Chabua area, Dibrugarh.	In Abstract of International Seminar on Bioresources and Human Sustenance. Zoology Department, Cotton College, Guwahati, Assam (Vol. 154).	2011	Das, S., Mondeep, C., & Kumar, S. R							YES (Seminar)	Assam	NA	NA
28	Nutrient composition and protein quality evaluation of eri silkworm (Samia ricinii) prepupae and pupae	Food Chemistry	2011	T.LongvahK.Mangthya P.Ramulu	Yes							Andhra Pradesh	Elsevier	https://doi.org/10.1016/j.foodchem.2011.03.041
29	Practices of entomophagy and entomotherapy by members of the Nyishi and Galo tribes, two ethnic groups of the state of Arunachal Pradesh (North-East India)	Journal of Ethnobiology and Ethnomedicine	2011	Jharna Chakravorty, Sampat Ghosh & Victor Benno Meyer-Rochow			yes					Arunachal Pradesh	BMC	https://doi.org/10.1186/1746-4269-7-5
30	Entomophagy can support rural livelihood in India.	Current Science, 103(1), 10.	2012	Gahukar, R. T.		YES						Maharashtra	Current Science Association in collaboration with Indian Academy of Sciences	NA
31	Traditional uses of insect and insect products in medicine and food by the Mishing tribe of Dhemaji District, Assam, North-East India.	Social Science Researcher, 1(2), 11-21	2012	Doley, A. K., & Kalita, J.			YES					Assam	North Lakhimpur College	NA
32	Ochrophora montana (Distant): a precious dietary supplement during famine in northeastern Himalaya.	Current Science, 2012, Vol. 102, No. 6, 845-846 ref. 20	2012	Thakur, N. A., & Firake, D. M.			YES					Maharashtra	Current Science Association in collaboration with Indian Academy of Sciences	NA
33	Entomophagy practices among the ethnic communities of Manipur, North-East India.	International Journal of Integrative sciences. Innovation and Technology., 1(5), 13-20.	2012	Shantibala, T., Lokeshwari, R. K., & Sharma, H. D.			YES					Manipur	Association of Global Science Innovations	NA
34	Assessment Of Nutritional Quality And Anti-Nutrient Composition Of two edible grasshopper (Orthoptera: Acrididae) - A Search For New Food Alternative	International Journal of Medicine and Pharmaceutical Science	2013	Mousumi Das & Suman Kalyan Mandal	Yes							West Bengal	Trans Stellar	http://www.tjprc.org/publishpapers/--1386077945-5.%20Assessment%20of%20nutritional.full.pdf
35	Comparative survey of entomophagy and entomotherapeutic practices in six tribes of Eastern Arunachal Pradesh (India).	Journal of Ethnobiology and Ethnomedicine, 9, 1-12.	2013	Chakravorty, J., Ghosh, S., & Meyer-Rochow, V. B.			YES					Arunachal Pradesh	Springer	https://doi.org/10.1186/1746-4269-9-50
36	Insects as human food: Are they really tasty and nutritious?	Journal of Agricultural & Food Information, 14(3), 264-271.	2013	Gahukar, R. T.		YES						Maharashtra	Taylor and Francis Ltd	https://doi.org/10.1080/10496505.2013.803418
37	Entomophagy by the tribal communities of North East India.	Indian Journal of Entomology, 75(2), 132-136.	2013	Singh, K. M., Singh, M. P., Kumawat, M. M., & Riba, T.			YES					Manipur	Entomological society of India	https://www.indianjournals.com/ijor.aspx?target=ijor:ije&volume=75&issue=2&article=009
38	Notes on entomophagy and entomotherapy generally and information on the situation in India in particular.	Applied entomology and zoology, 48(2), 105-112.	2013	Meyer-Rochow, V. B., & Chakravorty, J.		YES						Arunachal Pradesh	Springer	https://doi.org/10.1007/s13355-013-0171-9
39	Diversity of edible insects and practices of entomophagy in India: an overview.	Journal of Biodiversity, Bioprospecting and Development, 1(3), 124.	2014	Chakravorty, J.		YES						Arunachal Pradesh	Hilaris Publisher	https://www.hilarispublisher.com/open-access/diversity-of-edible-insects-and-practices-of-entomophagy-in-india-an-overview-2376-0214.1000124.pdf
40	Nutritional and Antinutritional Composition of the Five Species of Aquatic Edible Insects Consumed in Manipur, India	Journal of Insect Science, Volume 14, Issue 1, 14	2014	T. Shantibala, R. K. Lokeshwari, H. Debaraj	Yes							Manipur	Oxford University Press	https://doi.org/10.1093/jis/14.1.14
41	Nutritional composition of Chondacris rosea and Brachytrupes orientalis: Two common insects used as food by tribes of Arunachal Pradesh, India.	Journal of Asia-Pacific Entomology, 17(3), 407-415.	2014	Chakravorty, J., Ghosh, S., Jung, C., & Meyer-Rochow, V. B.	YES							Arunachal Pradesh	Elsevier	https://doi.org/10.1016/j.aspen.2014.03.007
42	Edible Insects: Future of Human Food - A Review	International Letters of Natural Sciences	2014	P. Pal and S.Roy		Yes						West Bengal	Sci Press	https://doi.org/10.18052/www.scipress.com/ILNS.26.1
43	Myositis due to Consumption of Swarmer Termites: A Case Report.	Indian Journal of Forensic Medicine & Toxicology, 8(2).	2014	Agrawal, A., Venkatrathamma, P. N., & Srinivas, S. V.							YES(Case report)	Karnataka	Institute of Medico-legal Publications	NA
44	Scrummy Insect in my Stomach!	SCIENCE REPORTER, February	2014	Vijaykumar, P. V., & Pandharinath, S. P.						YES		Maharashtra	CSIR-NIScPR	https://nopr.niscpr.res.in/bitstream/123456789/26400/1/SR%2051%282%29%2022-25.pdf
45	Edible and medicinal insects of Manipur.	Indian Journal of Entomology, 76(3), 256-259.	2014	Ayekpam, N., Singh, N. I., & Singh, T. K.			YES					Manipur	Entomological Society of India	NA
46	A study on the prevalence of entomophagy among the Bodos of Assam.	Journal of entomology and zoological studies, 3(2), 315-320.	2015	Narzari, S., & Sarmah, J.			YES					Assam	Society of Agricultural Research and Social Development	https://www.entomoljournal.com/vol3Issue2/3-3-5.1.html
47	Protein and carbohydrate contents of certain edible insects in Manipur.	Indian Journal of Entomology, 77(3), 235-239.	2015	Singh, R. K., Alka, K., Singh, O. G., & Singh, K. K.	YES							Manipur	Entomological Society of India	Article DOI : 10.5958/0974-8172.2015.00049.8
48	An overview of Edible insects in Eastern Himalayas: indigenous traditional food of Tribal’s.	Ecology Environment and Conservation, 21, 1941-1946.	2015	Chowdhury, S., Sontakke, P. P., Bhattacharjee, J., Bhattacharjee, D., Debnath, A., Kumar, A., & Datta, J.			YES					Mizoram	EM International	NA
49	Determinants of willingness to eat insects in the USA and India.	Journal of Insects as Food and Feed, 1(3), 215-225.	2015	Ruby, M. B., Rozin, P., & Chan, C. D			YES					EXCEPTIONAL	Wageningen Academic Publishers	https://doi.org/10.3920/JIFF2015.0029
50	Proximate composition of wild edible insects consumed by the Bodo tribe of Assam, India.	International Journal of Bioassays, 4(7), 4050-4054.	2015	Narzari, S., & Sarmah, J				YES				Assam	Publishers International Linking Association, Inc.	NA
51	Ethno-entomological practices of Rabha tribe with special reference to edible insects in Goalpara district of Assam.	Environment and Ecology, 33(4A), 1662-1666.	2015	Das, J., Kalita, S., Talukdar, K., & Das, S. (2015).			YES					Assam	NA	https://www.cabidigitallibrary.org/doi/pdf/10.5555/20153403200
52	Edible Insects as tribal food among the Rabhas of Assam.	IRA-International Journal of Management & Social Sciences, 3(2), 349-357.	2016	Rabha, B.			YES					Assam	Institute of Research Advances	https://dx.doi.org/10.21013/jmss.v3.n2.p16
53	Edible Insects of Northeast India	In: Purkayastha, J. (eds) Bioprospecting of Indigenous Bioresources of North-East India, pp.253-267	2016	Sangma, R.H.C., Pal, R., Singh, D.R.							YES(Book chapter)	Sikkim	Springer, Singapore.	https://doi.org/10.1007/978-981-10-0620-3_15
54	Entomophagy and entomotherapy practiced among the indigenous populations of Western Ghats of Tamil Nadu, India.	International Journal of Zoology Studies, 1(1), pp. 30-33	2016	Philip Samuel, P., Govindarajan, R., Krishnamoorthy, R., Victor Jerald Leo, S. A., Paramasivan, R., & Arunachalam, N.			YES					Tamil Nadu	Delhi: Gupta Publications	https://www.researchgate.net/profile/Govindarajan-Renu/publication/330847269
55	Edible insects of Nagaland and its nutritional benefit.	Periodic Research, 5, 1-7.	2016	Singson, L., Das, A. N., & Ahmed, R.			YES					Nagaland	Social Research Foundation	https://www.researchgate.net/profile/Arup-Das-9/publication/342882649
56	Insects for food: an unexplored bioresource for make in India.	Journal of Applied Zoological Researches, 27(2), 97-112.	2016	Shrivastava, S. K., & Anand, P		YES						Chhattisgarh	Applied Zoologists Research Association	https://www.cabdirect.org/cabdirect/abstract/20173132268
57	Nutritional and anti-nutritional composition of Oecophylla smaragdina (Hymenoptera: Formicidae) and Odontotermes sp.(Isoptera: Termitidae): Two preferred edible insects of Arunachal Pradesh, India.	Journal of Asia-Pacific Entomology, 19(3), 711-720.	2016	Chakravorty, J., Ghosh, S., Megu, K., Jung, C., & Meyer-Rochow, V. B.	YES							Arunachal Pradesh	Elsevier	https://doi.org/10.1016/j.aspen.2016.07.001
58	Scope of Insect Farming and Entomophagy.	In Reshaping Agriculture and Nutrition Linkages for Food and Nutrition Security, 326, 136-142	2016	Rao, M. S							YES (Book chapter)	Telangana	ICAR-CRIDA	http://krishi.icar.gov.in/jspui/handle/123456789/60426
59	Terrestrial edible insects and their therapeutic value in Moridhal Panchayat of Dhemaji district, Assam, Northeast-India.	International Journal of Fauna and Biological Studies, 3(6), 11-4.	2016	Dutta, L., Ghosh, S. S., Deka, P., & Deka, K.				YES				Assam	AkiNik Publications	NA
60	A Study on the Use of Insects as Food in Seven Tribal Communities in Nagaland, Northeast India	Journal of human ecology	2017	L. Mozhui and L.N. Kakati and Sapu Changkija			Yes					Nagaland	Taylor and Francis Group	https://doi.org/10.1080/09709274.2017.1399632
61	Antioxidant and glucose metabolizing potential of edible insect, Brachytrupes orientalis via modulating Nrf2/AMPK/GLUT4 signaling pathway	Biomedicine and Pharmacotherapy	2017	Prachurjya Dutta, Tapan Dey, Anjum Dihingia, Prasenjit Manna, Jatin Kalita				YES				Assam	Elsevier	https://doi.org/10.1016/j.biopha.2017.08.094
62	Insects as food.	Industrial entomology, pp. 413-434.	2017	Mishra, G., & Omkar							Yes (Book chapter)	Uttar Pradesh	Springer, Singapore.	https://doi.org/10.1007/978-981-10-3304-9_15
63	Insect Bioprospecting Especially in India.	In: Paterson, R., Lima, N. (eds) Bioprospecting. Topics in Biodiversity and Conservation, vol 16.	2017	Srivastava, S.K.							Yes (Book chapter)	Odisha	Springer, Cham.	https://doi.org/10.1007/978-3-319-47935-4_11
64	Gateway for alternative protein production.	Biodiversity International Journal, 1(2), 00008.	2017	Chowdhury, G. R., Mukherjee, P., Biswas, P., Chowdhury, R. R., & Zaman, S.		YES						West Bengal	MedCrave Group	NA
65	Edible insects: Future prospects for dietary regimen.	International Journal of Current Microbiology and Applied Sciences, 6(8), 1302-1314.	2017	Seni, A.		YES						Odisha	Excellent Publishers	https://doi.org/10.20546/ijcmas.2017.608.158
66	Entomophagy (insects as human food): a step towards food security.	Poster, Dr Y S Parmar University of Horticulture and Forestry, Nauni, Solan (HP) India	2017	Thakur, A., Thakur, K. S., & Thakur, N. S.							YES (Poster)	Himachal Pradesh	NA	https://www.researchgate.net/profile/Abhimanyu-Thakur-3/publication/323367096
67	Entomophagy A New Dimension towards Food Security	Organic & Medicinal Chemistry International Journal, vol. 3(1), pages 8-9, July.	2017	Goutam Roy Chowdhury & Sufia Zaman & Upasana Datta & Nabonita Pal & Abhijit Mitra		YES						West Bengal	Juniper Publishers Inc.	DOI:10.19080/OMCIJ.2017.03.555603
68	Entomophagy among the Bodos of Udalguri District, BTAD, Assam, India.	Asian Journal of Science and Technology, 8, 6228-6233.	2017	Hazarika, R., & Goyari, B.			YES (Survey)					Assam	M.Gayathri	https://www.researchgate.net/profile/Rabindra-Hazarika/publication/359120078
69	Entomophagy: Future human food.	Rashtriya Krishi, Volume 2, Issue 12, pp. 119-120	2017	Satapathy, S. N.						YES		Odisha	Hind Agricultural Research and Training Institute	https://www.researchgate.net/profile/Noushad-Parvez/publication/323166895
70	Entomophagy: Insects as food source.	Book	2017	Shrivastava, S. K., Allotey, J. A., Prakash, A., & Rao, J.							YES (Book)	Chhatisgarh	Applied Zoologists Research Association.	http://www.azra-india.com/uploads/1/4/9/6/14964328/jazr-vol29no1jun18.pdf
71	Original Research Article Species of Tari in Arunachal Pradesh: Morphology, Ecology and Toxicity of Entomophagy.	Journal of Bioresources, 4(2), 50-57.	2017	Gogoi, H., Moyong, B., Sonia, K., & Umbrey, C.			YES					Arunachal Pradesh	Center with Potential for Excellence in Biodiversity, Rajiv Gandhi University	https://jbr.rgu.ac.in/img/pdf/50_to_57.pdf
72	Practice of entomophagy by the Bodo community residing in rani area of Kamrup district, Assam.	International Journal of Applied Research, 3(6):387-389.	2017	Sasanka Sekhar Ghosh, Barsha Bhagabati, Sourav Chatterjee and Parag Deka.			YES					Assam	Delhi: Research Journals	https://www.allresearchjournal.com/archives/?year=2017&vol=3&issue=6&part=F&ArticleId=3863
73	An ethnographic account of the role of edible insects in the Adi tribe of Arunachal Pradesh, North-East India.	Edible insects in sustainable food systems, 35-54.	2018	Megu, K., Chakravorty, J., & Meyer-Rochow, V. B.			YES					Arunachal Pradesh	Springer	https://doi.org/10.1007/978-3-319-74011-9_3
74	Edible insect resources and their use among the dimasa kacharis of Dima Hasao District, Assam	Indian Journal of Entomology, 80(2), 445-451.	2018	Langthasa, S., Teron, R., & Tamuli, A. K.			YES					Assam	Entomological Society of India	Article DOI : 10.5958/0974-8172.2018.00087.1
75	Entomophagy for nutritional security in India.	Current Science, 115(6), 1078-1084.	2018	Gahukar, R. T.		YES						Maharashtra	Current Science Association in collaboration with Indian Academy of Sciences	https://www.jstor.org/stable/26978359
76	Entomophagy in traditional healthcare practiced by indigenous communities: potential, implications and constraints.	International Journal of Basic and Applied Sciences, 7(4), 55-61.	2018	Gahukar, R. T.	YES							Maharashtra	Institute of Computer Science	NA
77	Edible and therapeutic uses of insects among the various tribes of Dimoria Development Block of Assam, India.	In Scenario of Environmental Research and Development	2018	Sharma S.							YES (Book chapter)	Assam	IJMIR	NA
78	Insects as an Alternate Source for Food to Conventional Food Animals	Indian Journal of Pure & Applied Biosciences6(2): 697-705	2018	Poshadri, A., Palthiya, R., Charan, S.G., Butti, P.		YES						Telangana	VITAL BIOTECH	doi: http://dx.doi.org/10.18782/2320-7051.5356
79	Insects-an innovative source of food.	The Indian Journal of Nutrition and Dietetics, 55(1), 108.	2018	Pandey, S., & Poonia, A.		YES						Uttar Pradesh	Informatics Publishing Limited	DOI:10.21048/ijnd.2018.55.1.16535
80	Insect For Nutraceutical-An Unexplored Wealth Of India.	Journal of Applied Zoological Researches, 29(1), 1-22.	2018	Shrivastava, S. K., Prakash, A., & Rao, J. (2018).		YES						Chhattisgarh	Applied Zoologists Research Association,(AZRA),	NA
81	Entomophagy practiced among the Tiwa community of Morigaon district, Assam	Journal of Entomology and Zoology Studies	2018	Arlina Rahman, Sunayan Bordoloi and Salma Mazid			Yes					Assam	Society of Agricultural Research and Social Development	https://www.entomoljournal.com/archives/2018/vol6issue1/PartG/5-6-270-468.pdf
82	Arunachal's Adi and Apatani tribes' traditional knowledge of harvesting and using edible insects.	Journal of Insects as Food and Feed, 5(2), 125-135.	2019	Chakravorty, J., Jugli, S., Boria, M., & Meyer-Rochow, V. B.			YES					Arunachal Pradesh	Wageningen Academic Publishers	https://doi.org/10.3920/JIFF2018.0019
83	A study on the prevalence of entomophagy among the Koch-Rajbongshis of North Salmara subdivision of Bongaigaon district.	International Journal of Basic and Applied Research, 9(3), 382-388.	2019	Das, K., Bardoloi, S., & Mazid, S.				YES				Assam	Pragati publications	https://www.researchgate.net/profile/Karanjit-Das/publication/331791303_
84	Entomophagy Diversity in India a Review	International Journal of Emerging Technologies and Innovative Research ISSN, 2349-5162.	2019	Sharma, S., & Banu, N.		YES						Punjab	JETIR	https://papers.ssrn.com/sol3/papers.cfm?abstract_id=3691243
85	Ethnozoology and entomophagy of Ao tribe in the district of Mokokchung, Nagaland.	Indian Journal of Traditional Knowledge (IJTK), 18(3), 508-515.	2019	Pongener, A., Ao, B., Yenisetti, S. C., & Lal, P.			YES					Nagaland	National Institute of Science Communication and Information Resources	DOI: 10.56042/ijtk.v18i3.26736
86	ENTOMOPHAGY: Grab the grub for a better future.	Agriculture & Food: e- Newsletter, 1, 11100.	2019	Mondal, P., & Ganguly, M. (2019).						YES		Karnataka	Balurghat: Agriculture & Food e- Newsletter	Article id: 11100
87	Edible insects consumed by different ethnic people in Manipur and its potential use in food and feed.	FOOD BIORESOURCES AND ETHNIC FOODS OF MANIPUR, NORTH EAST INDIA, pp.38-46.	2019	Lokeshwari, R. K., & Shantibala, T.							YES (Book chapter)	Manipur	Empyreal Publishing House	https://www.empyrealpublishinghouse.com/pdf/dr-prakash-sarangi.pdf#page=51
88	Disgust, sushi consumption, and other predictors of acceptance of insects as food by Americans and Indians.	Food Quality and Preference, 74, 155-162.	2019	Ruby, M. B., & Rozin, P.			YES					EXCEPTIONAL	Elsevier	https://doi.org/10.1016/j.foodqual.2019.01.013
89	Exploitation of insects	Modern Trends in Agriculture, pp. 333-349	2019	Mandeep Kaur and TamanreetKaur		YES						Punjab	Scire Science	https://www.researchgate.net/profile/Anwesha-Sinha/publication/351783415
90	Grsashopper: an untapped halal food source for future India.	J. Appl. Zool. Res, 30(2), 93-132.	2019	Shrivastava, S. K., Prakash, A., Rao, J., Saxena, S., & Arif, M.		YES						Chhattisgarh	AZRA	NA
91	Macronutrient and mineral content of edible Coleopteran with reference to the Baksa district, India.	The Clarion-International Multidisciplinary Journal, 8(2), 15-20.	2019	Das, J. K., & Hazarika, A. K.	YES							Assam	Centre for Environment, Education and Economic Development (CEEED)	Article DOI : 10.5958/2277-937X.2019.00013.3
92	Traditional method of hunting edible termite, Odontotermes formosanus Shiraki by the Irulars of Gingee hills, South India.	Ethnobotany Research and Applications, 18, 1-12.	2019	Muruganandam, S., Ravikumar, S., Dhamotharan, R., & Ayyanar, M.			YES					Tamil Nadu	Department of Ethnobotany, Institute of Botany, Ilia State University, Tbilisi, Georgia	https://www.researchgate.net/profile/Muniappan-Ayyanar/publication/333798897
93	A study on prevalence of the practice of entomophagy in Upper Brahmaputra Valley of Assam, North-East India.	Journal of Entomological Research, 44(1), 135-140.	2020	Borah, S., Boruah, A., Sonowal, P., & Bora, D.			YES					Assam	Malhotra Publishing House	http://dx.doi.org/10.5958/0974-4576.2020.00025.0
94	A review on edible insects and their utilization in Northeastern Himalaya	Journal of entomology and Zoology Studies	2020	R. Thangjam, V. Kadam, K. Ningthoujam & M. Sorokhaibam		Yes						Mizoram	Society of Agricultural Research and Social Development	NA
95	Anthropo-entomophagy and ethno-entomology among the ethnic Mao-Naga and Poumai-Naga tribes of Manipur, Northeast India.	Journal of Insects as Food and Feed, 6(5), 507-514.	2020	Kapesa, K., Devi, W. D., Bonysana, R. K., & Rajashekar, Y			YES					Manipur	Wageningen Academic Publishers	https://doi.org/10.3920/JIFF2020.0012
96	Diversity of edible insects in a Natural World Heritage Site of India: entomophagy attitudes and implications for food security in the region	PeerJ Life & Environment	2020	Arup Kumar Hazarika, Unmilan Kalita, Subhash Khanna, Tarali Kalita, Sangeeta Choudhury			YES					Assam	Sage, O'Reilly Media	https://doi.org/10.7717/peerj.10248
97	Edible insects collected from forests for family livelihood and wellness of rural communities: A review	Global Food Security	2020	Gahukar, R. T.		Yes						Maharashtra	Elsevier	https://doi.org/10.1016/j.gfs.2020.100348
98	Entomophagy: A Culinary Heritage of Manipur.	In The Cultural Heritage of Manipur (pp. 193-207). Routledge.	2020	Kom, G. K., & Arunkumar, M. C.							YES (Book chapter)	Manipur	Taylor & Francis Group	DOI:10.4324/9781003132745-21
99	Ethnoentomological practices by tribes and rurals of Satpura plateau of Madhya Pradesh, India.	Journal of Entomology and Zoology Studies, 8(2), 833-837.	2020	Bhowate, S., & Kumar, P.			YES					Madhya Pradesh	Society of Agricultural Research and Social Development	https://antwiki.org/wiki/images/3/39/Bhowate,_S.,_Kumar,_P._2020._Ethnoentomological_practices.pdf
100	Entomophagy: insects as human food.	Agriculture & Food, 56, 76. (e-Newsletter)	2020	Singh, S.						YES		Uttar Pradesh	Agriculture & Food (Open Access Magazine cum e-Newsletter)	Article id: 23627
101	Insects and snails: Delicacies of Bodo community of Assam.	Asian Agri-History, 24(1).	2020	Kalita, S., Hazarika, L. K., & Gayon, J			YES					Assam	Asian Agri-History Foundation	NA
102	Loungu (Carpenter worm): Indigenous delicious insects with immense dietary potential in Nagaland state, India.	Indian Journal of Traditional Knowledge, Vol 19(1), pp 145-151	2020	Aochen, C., Krishnappa, R., Firake, D. M., Pyngrope, S., Aochen, S., Ningombam, A., ... & Ngachan, S. V	YES							Nagaland	NISCAIR-CSIR, India	https://nopr.niscpr.res.in/handle/123456789/52822
103	Oral dose toxicity of aqueous extract of Mimela sp. an edible insect of Arunachal Pradesh on mice model.	Journal of Experimental Zoology India, 23(1), pp. 535-540	2020	Yashung, P., Thukshipa, S. D., & Chakravorty, J.				YES				Arunachal Pradesh	DR. P. R. YADAV (e-published by Connect journals)	https://www.connectjournals.com/file_full_text/3079301H_535-540.pdf
104	Proximate and mineral compositions of Samia cynthia ricini and Dytiscus marginalis, commonly consumed by the Bodo tribe in Assam, India.	Bulletin of the National Research Centre, 44(1), 1-7.	2020	Choudhury, K., Sarma, D., Sapruna, P. J., & Soren, A. D.				YES				Assam	Springer Open	https://doi.org/10.1186/s42269-020-00411-y
105	Traditional Knowledge of the Utilization of Edible Insects in Nagaland, North-East India	Foods, 9(7), 852.	2020	Lobeno Mozhui 1, L.N. Kakati 1, Patricia Kiewhuo and Sapu Changkija					Yes			Nagaland	Multidisciplinary Digital Publishing Institute	https://doi.org/10.3390/foods9070852
106	Traditional value of Red weaver ant (Oecophylla smaragdina) as food and medicine in Mayurbhanj district of Odisha, India.	International Journal for Research in Applied Science & Engineering Technology, 8, 936-946.	2020	Jena, S., Das, S. S., & Sahu, H. K.			YES					Odisha	Sonepat: International journal for research in applied science and engineering technology	https://www.ijraset.com/fileserve.php?FID=28460
107	A review on entomophagy: Natural food insects for ethnic and tribal communities of North-East India.	Journal of Environmental Biology, 42(6), 1425-1432.	2021	Haldhar, S. M., Thangjam, R., Kadam, V., Jakhar, B. L., Loganathan, R., Singh, K. I., & Singh, K. M.		YES						Manipur	Triveni Enterprises	DOI : http://doi.org/10.22438/jeb/42/6/MRN-1809
108	Cultural entomology and edible insect diversity in a wetland ecosystem: A case study from the Loushi pat basin, Manipur	Journal of Traditional Knowledge, 20(1), 180-190.	2021	Babu, S., & Singh, M. O. K.					YES			Manipur	National Institute of Science Communication and Information Resources	DOI: 10.56042/ijtk.v20i1.29055
109	Distribution and nutritional worth of orthopteran insects: A review.	International Journal of Entomology Research	2021	Meena, P., & Meena, S		YES						Rajasthan	Gupta Publications	https://www.researchgate.net/profile/Pooja-Meena-8/publication/355173794
110	Entomophagy	Biotica Research Today 3(5): 290-291	2021	Nisha Pradeepa K.* and A. Subash Chandra Bose		YES						Tamil Nadu	Society for Biotic and Environmental Research (SBER) & BIOTICA	https://biospub.com/index.php/biorestoday/article/view/848/655
111	[Explainer] Eating insects could be the future of food	Mongabay News and Inspiration from Nature's India	2021	Femi E. Benny						YES		Karnataka	Mongabay-India	https://india.mongabay.com/2021/05/explainer-eating-insects-could-be-the-future-of-food/
112	Entomophagy and the preservation of human food security.	South Asian Journal of Marketing & Management Research, 11(11), pp. 21-26	2021	Vibhor Jain		YES						Uttar Pradesh	South Asian Academic Research Journals	DOI:10.5958/2249-877X.2021.00104.1
113	Insects as food and feed: a promising agricultural sector with special reference to India	Journal of Insects as Food and Feed, 7(4), 471-482.	2021	Deka, B., Tomberlin, J. K., & Babu, A.		YES						West Bengal	Wageningen Academic Publishers	https://doi.org/10.3920/JIFF2020.0131
114	Prospects of entomophagy.	International Journal of Tropical Insect Science, 41(3), 1989-1992.	2021	Puzari, M.		YES						Assam	Springer	https://doi.org/10.1007/s42690-020-00317-2
115	Chapter-1 The Biochemical Characterization of Edible Insects of Kamrup District, Assam.	MULTIDISCIPLINARY, 29, 1.	2021	Choudhury, S., & Hazarika, A. K.							YES (Book chapter)	Assam	AkiNik Publications	https://www.researchgate.net/profile/Dr-Ganesh-C-S/publication/358864562
116	The Practices Of Entomophagy Around The World With Special Reference To North-East India: A Primitive Practice That Needs To Be Safeguarded.	Plant Archives, 21(2), 1-9.	2021	Bhowmick, D., Banu, N., & Singh, K. S.		YES						Punjab	Dr, R.S. Yadav	DOI Url : https://doi.org/10.51470/PLANTARCHIVES.2021.v21.no2.001
117	Entomophagy: Future Platform for Enhancing Food and Feed Security.	Integrated Pest Management Strategies for Sustainable Agriculture; 181-189.	2021	Pal, S., & Bhattacharya, S.							YES (Book chapter)	West Bengal	NEW DELHI PUBLISHERS	DOI: 10.30954/ndp/intpest.13
118	Molecular identification of edible insects of Nagaland.	International Journal of Entomology Research	2021	Tzudir, L., & Markandan, M.				YES				Nagaland	Gupta Publications	https://www.researchgate.net/publication/358349420_Molecular_identification_of_edible_insects_of_Nagaland
119	Multiple Facets of Edible Insect Utility as Nutrient Power Pack and Economic Empower Bank.	Biological Forum – An International Journal 13(3): 643-647	2021	Shantibala, T., Tatan, T., Ansari, M. T., Devi, N. S., & Waikhom, G.	YES							Arunachal Pradesh	Research Trend	https://www.researchgate.net/profile/Tantulung-Tatan/publication/361954516
120	Identification and documentation of edible insects of Vespa affinis in Nagaland by using DNA barcode techniques.	International Journal of Pharmaceutical Sciences and Research, 12, 1529-32.	2021	Tzudir, L., & Markandan, M.				YES				Nagaland	Society of Pharmaceutical Sciences & Research	DOI:10.13040/IJPSR.0975-8232
121	Nutrient and toxic heavy metal assessment of Tarbinskiellus portentosus and Schizodactylus monstrosus consumed by the Bodo tribe in Assam, India.	International Journal of Tropical Insect Science, 41(3), 2001-2006.	2021	Soren, A. D., Choudhury, K., Sapruna, P. J., & Sarma, D.	YES							Assam	Cambridge University Press	https://doi.org/10.1007/s42690-021-00439-1
122	Retrospection of Outbreaks of Spodoptera mauritia Boisduval in NER India: The Solution Lies in Ecological Engineering, Not in Insecticides.	Sustainability, 13(22), 12824.	2021	Sarma, A. K., Damgaard, C., & Neog, P.		YES						Assam	MDPI	https://www.mdpi.com/2071-1050/13/22/12824
123	A review of progressing terminology 'entomophagy'	South Asian Journal of Marketing & Management Research, 11(11), pp.27-32	2022	Chawla Chanchal		YES						Uttar Pradesh	South Asian Academic Research Journals	Article DOI : 10.5958/2249-877X.2021.00105.3
124	Edible Insects Used as Food by Tangsa and Wancho Tribes of Changlang District, Arunachal Pradesh.	Indian Journal of Entomology, 654-656.	2022	Gogoi, R., Chetri, S., & Ahmed, R.			YES					Arunachal Pradesh	The Entomological Society of India	https://doi.org/10.55446/IJE.2021.36
125	Entomophagy and commercially available insects among the Sumi Nagas in Dimapur district of Nagaland, Northeast India.	International Journal of Current Microbiology and Applied Sciences 11(04): 295-301	2022	Sumi, A., & Ao, I.				YES				Nagaland	Excellent Publishers	https://doi.org/10.20546/ijcmas.2022.1104.038
126	Entomophagy and coprophagy in alcohol use disorder: a rare psychopathology.	Open Journal of Psychiatry & Allied Sciences, 13(1), 26-27.	2022	Jangid, P., Goyal, A., Bhushan, A., & Sethi, S.							YES (A case report)	Haryana	Academy Publisher in collaboration with Society for Mental Health in LAMIC	Article DOI : 10.5958/2394-2061.2022.00002.7
127	. Entomophagy and future foodstuff: a saga of sinister locusts in The Swarm.	Journal of Geek Studies, 9(2): 63-67	2022	Riyaz, M		YES						Tamil Nadu	São Paulo SP: [s.n.]	https://jgeekstudies.org/2022/07/29/entomophagy-and-future-foodstuff-a-saga-of-sinister-locusts-in-the-swarm/
128	Edible insects a novel food processing industry: an overview.	Agricultural Reviews 1: 2357.	2022	Nitharwal, Mukesh, Subhita Kumawat, Hanuman Singh Jatav, Mudassar Ahmed Khan, Kailash Chandra, Sanjay Kumar Attar, and S. R. Dhaka.		YES						Rajasthan	Agricultural Research Communication Centre	10.18805/ag.R-2357
129	Entomophagy- Insect as a Food.	Vigyan Varta 3(4): 1-4.	2022	Rai, S., Kumar, V. and Rai, C. P.		YES						Bihar	AB IMAGING & PRINTS PVT. LTD.	https://www.vigyanvarta.com/adminpanel/upload_doc/VV_0422_01.pdf
130	Entomophagy practices in Bodoland Territorial Region, Assam: nutritional potential and implications for food security.	Journal of Insects as Food and Feed, 8(12), 1485-1500.	2022	Kalita, T., Sharma, R., Sengupta, S., & Basumatari, D				YES				Assam	Wageningen Academic Publishers	https://doi.org/10.3920/JIFF2021.0141
131	Ethnotherapeutic practice of entomophagy species by the ethnic community of Tangkhul, Mao and Poumai community of Manipur, NER India.	Journal of Ethnic Foods, 9(1), 17.	2022	Devi, W. D., Bonysana, R., Kapesa, K., Mukherjee, P. K., & Rajashekar, Y.			YES (Survey)					Manipur	Springer	https://doi.org/10.1186/s42779-022-00132-9
132	Nutritional Aspects Of Entomophagy As Future Food For Livelihoods	International Journal of Agriculture and Allied Sciences 7(1): 18-24	2022	Sanket Shekhar Mahajan, Ashwani Kumar & Suhani Agarwal		YES						Uttar Pradesh	Research & Reviews.	http://www.agrilallied.com/admin_assets/uploads/document/journal_13747.pdf
133	Nutritional Composition of Some Commonly Available Aquatic Edible Insects of Assam, India.	Insects, 13(11), 976.	2022	Sarmah, M., Bhattacharyya, B., Bhagawati, S., & Sarmah, K.	YES							Assam	MDPI	https://doi.org/10.3390/insects13110976
134	Oecophylla smaragdina (Hymenoptera: Formicidae) and Odontotermes sp.(Isoptera: Termitidae) a potential source of antioxidant: the two most preferred edible insects of Arunachal Pradesh, India.	Discover Food, 2, 1-8.	2022	Raza, M., Tukshipa, S. D., & Chakravorty, J.				YES				Arunachal Pradesh	Springer	https://doi.org/10.1007/s44187-021-00005-1
135	Oecophylla smaragdina: source of tribal bio-entrepreneurship & its ecological aspects with medicinal plants.	Medico Biowealth of India-VII, pp. 15-19	2022	Raut, S. T., Mahanta, D., Pradhan, I., Sardar, S., & Kumar, S.							YES (Book chapter)	Maharashtra	APRF Publishers
136	Practice of entomophagy in North-East India: A review.	The Pharma Innovation Journal, 11 (10), pp. 462-468	2022	Pradhan, P. P., Sahoo, S., Hazarika, J., Rahman, T., & Kashyap, P		YES						Odisha	AkiNik Publications	https://doi.org/10.22271/tpi.2022.v11.i10Sg.16143
137	Nutritional aspects of an edible insect, Coridius sp.(Hemiptera: Dinidoridae) of Manipur.	Journal of Agriculture and Ecology, 14, 158-163.	2022	Thounaojam, S., Singh, K. M., Shantibala, T., Haldhar, S. M., & Singh, K. I	YES							Manipur	Society for Agriculture and Arid Ecology Research	https://doi.org/10.58628/JAE-2214-223
138	Quantitative Characterization of Microbial Load in Wild Harvested Edible Insects of Nagaland, India.	Journal of Environmental Biology	2022	Kiewhuo, Patricia & Trivedi, Neha & Mozhui, Lobeno & Dhillon, Mukesh & Kakati, Lakhmi.				YES				Nagaland	Elsevier	NA
139	Rising Concerns in Entomophagy.	AGRICULTURE & FOOD E-NEWSLETTER, 10, pp.163-165	2022	Appugol, K. A., Mangang, I. B., & Loganathan, M.						YES		Tamil Nadu	Balurghat: Agriculture & Food e- Newsletter	Article ID: 36559
140	Shipment of insects and related arthropods into and out of India for research or commercial purposes.	Revue scientifique et technique (International Office of Epizootics), 41(1), 158-164.	2022	Kumar, P. S., Sreedevi, K., Amala, U., Gupta, A., & Verghese, A.		YES						Karnataka	Office International des Epizooties	DOI:10.20506/rst.41.1.3312
141	Nutritive value of bamboo worm Omphisa fuscidentalis (Lepidoptera: Crambidae): An edible insect as protein rich food.	Pharma Innovation, 11(7), 2229-2233.	2022	Sheileja, T., Shantibala, T., & Singh, K. M	YES							Arunachal Pradesh	AkiNik Publications	https://www.thepharmajournal.com/archives/2022/vol11issue7/PartAB/11-7-68-433.pdf
142	Silkworm as an edible insect: A review.	The Pharma Innovation Journal; SP-11(2): 1667-1674	2022	Sharma, A., Gupta, R. K., Sharma, P., Duwa, A. K., & Bandral, R. S.		YES						Jammu & Kashmir	AkiNik Publications	https://www.thepharmajournal.com/archives/2022/vol11issue2S/PartU/S-11-2-179-271.pdf
143	The potential of entomophagy against malnutrition and ensuring food sustainability	African Journal of Biological Sciences, 4(4), pp. 15-22	2022	Fatik Baran Mandal and Moumita Dutta		YES						West Bengal	African Journal of Biological Sciences	https://doi.org/10.33472/AFJBS.4.4.2022.15-22
144	The practice of entomophagism in India by indigenous people: past, present, and future.	In Indigenous People and Nature (pp. 329-352).	2022	Manna, S., Dolai, A., Mondal, D., Ghosh, D., & Das, A.							YES (Book chapter)	West Bengal	Elsevier.	https://doi.org/10.1016/B978-0-323-91603-5.00003-8
145	Nutritive evaluations of laboratory-reared edible field cricket Coiblemmus compactus Chopard, 1928 (Orthoptera: Gryllidae), for utilising them as an alternate protein source. (1 citation)	The Journal of Basic and Applied Zoology, 83(1), 26.	2022	Lokeshkumar, V., Daniel, B. A., Jayanthi, J., & Ragunathan, M. G. (2022)	YES							Tamil Nadu	Springer Nature.	https://doi.org/10.1186/s41936-022-00289-4
146	Traditional Indigenous Foods and Beverages Of Various Communities Of Sadiya Sub-Division Of Tinsukia District, Assam, India.	Uttar Pradesh Journal Of Zoology, 30-37.	2022	Ghosh, S. S., Chetri, S., Borah, L., & Saikia, K.			YES					Assam	MB International Media and Publishing House	https://www.mbimph.com/index.php/UPJOZ/article/view/2894
147	Socio-economic analysis of edible insect species collectors and vendors in Nagaland, North-East India	Journal of Insects as Food and Feed	2023	L. Mozhui, L.N. Kakati,B. Ao, V. Kezo, and V.B. Meyer-Rochow			YES					Nagaland	Wageningen Academic Publishers	https://doi.org/10.1163/23524588-20230082
148	Edible insects: As traditional medicine for human wellness	Future Foods	2023	Wahengbam Deepanita Devi, Rajkumari Bonysana, Kokho Kapesa, Pulok Kumar Mukherjee, Yallappa Rajashekar		YES						Manipur	Elsevier.	https://doi.org/10.1016/j.fufo.2023.100219
149	Edible insects as emerging food products–processing and product development perspective	Journal of Food Science and Technology	2023	U. Gnana Moorthy Eswaran, Sangeetha Karunanithi, Rakesh Kumar Gupta, Srutee Rout & Prem Prakash Srivastav		YES						West Bengal	Springer	https://doi.org/10.1007/s13197-022-05489-y
150	Nutritional properties of giant water bug, Lethocerus indicus a traditional edible insect species of North-East India	Bioengineered	2023	Mutum R. Devi,Sabeela B. Ummalyma,Axel Brockmann,Vishakha Raina & Yallappa Rajashekara				YES				Manipur	Taylor and Francis	https://doi.org/10.1080/21655979.2023.2252669
151	Human consumption of insects	Science	2023	ARUP KUMAR HAZARIKA AND UNMILAN KALITA		YES						Assam	American Association for the Advancement of Science	10.1126/science.abp8819
152	Diversity and Abundance of Edible Orthopterans Insects and their Future Prospects for Food Security of the People in Baksa District, Assam, India	Asian Journal of Research in Animal and Veterinary Sciences	2023	Jayanta Kr. Das				YES				Assam	Ms. M. B. Mondal, Ph.D.Guest House Road, Street no - 1/6, Hooghly, West Bengal, India	https://journalajravs.com/index.php/AJRAVS/article/view/245
153	Entomophagy practices among the primitive tribes inhabiting the Nilgiris district of Western Ghats, Tamil Nadu, South India	Indian Journal of Traditional Knowledge	2023	V Lokeshkumar, B.A Daniel,J.Jayanthi & M G Ragunathan			YES					Tamil Nadu	NIScPR PUBLICATIONS	10.56042/ijtk.v22i1.42199
154	Drosophila as a Potential Functional Food: An Edge Over Other Edible Insects	3D Printing of Sustainable Insect Materials	2023	Aanchal Sharma & Seema Ramniwas							BOOK CHAPTER	Punjab	Springer	https://doi.org/10.1007/978-3-031-25994-4_7
155	Spray coating of edible insect waxes for liquid food packaging	Applied Surface Science	2023	Arihant Ahuja, Vibhore Kumar Rastogi				YES				Uttarakhand	Elsevier	https://doi.org/10.1016/j.apsusc.2023.157150
156	Evaluation of Anti-Oxinflammatory and ACE-Inhibitory Properties of Protein Hydrolysates Obtained from Edible Non-Mulberry Silkworm Pupae (Antheraea assama and Philosomia ricinii)	Nutrients	2023	Preeti Sarkar,Alessandra Pecorelli, Brittany Woodby,Erika Pambianchi,Francesca Ferrara,Raj Kumar Duary,Giuseppe Valacchi	YES							Assam	MDPI	https://doi.org/10.3390/nu15041035
157	Opportunities and Challenges of Edible Insects As Feed And Food.	Frontiers in Food Science & Nutrition, 62	2023	Maisnam, N., Devi, K. J., & Konthoujam, T.							YES (Book chapter)	Assam	Academic publishers & Distributors in collaboration with Research Floor	https://www.researchgate.net/profile/Vidhya-C-S/publication/376893394
158	Tessaratoma javanica and Coridius singhalanus in the practice of entomophagy in Nagaland: an assessment of their nutritional quality	Bulletin of the National Research Centre	2023	Anungla Pongener, Bendang Ao, Sarat Chandra Yenisetti & Amar Deep Soren				YES				Nagaland	Springer	https://doi.org/10.1186/s42269-023-01067-0
159	A preliminary review of some interesting aspects of bio-ethology of the chalcids (Hymenoptera: Chalcidoidea) associated with plant galls	Proceedings: Animal Sciences	1984	Narendran T.C.			YES					Kerala	Springer Link	10.1007/BF03186246
160	Chemical composition of Aspongopus nepalensis Westwood 1837 (Hemiptera; Pentatomidae), a common food insect of tribal people in Arunachal Pradesh (India)	International Journal for Vitamin and Nutrition Research	2011	Chakravorty J.; Ghosh S.; Meyer-Rochow V.B.				YES				Arunachal Pradesh	Hogrefe-Verlag GmbH and Co. KG	10.1024/0300-9831/a000050
161	Provisioning services from ants: Food and pharmaceuticals	Asian Myrmecology	2011	Rastogi N.		YES						Uttar Pradesh	Penerbit University Malaysia Sabah
162	Functional significance of Micraspis discolor (F.) (Coccinellidae: Coleoptera) in rice ecosystem	Journal of Applied Entomology	2013	Shanker C.; Mohan M.; Sampathkumar M.; Lydia C.; Katti G.						YES		Andhra Pradesh	Wiley Online	10.1111/jen.12035
163	Aquatic edible insects of Loktak Lake of Manipur, North East, India	Journal of Entomological Research	2014	Bhubaneshwari Devi M.; Sandhyarani Devi O.; Dineshwor Singh S.			YES					Manipur	Malhotra Publishing House
164	Insects for human diet from Kolhapur region, India	International Journal of Pharma and Bio Sciences	2015	Sathe T.V.			YES					Maharashtra	International Journal of Pharma and Bio Sciences	10.5555/20153166514
165	Antioxidant potential of Vespa affinis L., a traditional edible insect species of North East India	PLoS ONE	2016	Dutta P.; Dey T.; Manna P.; Kalita J.				YES				Assam	Public Library of Science	10.1371/journal.pone.0156107
166	The first complete mitochondrial genome of a Belostomatidae species, Lethocerus indicus, the giant water bug: An important edible insect	Gene	2016	Devi K.M.; Shantibala T.; Debaraj H.				YES				Manipur	Elsevier B.V.	10.1016/j.gene.2016.07.004
167	Edible Insects Farming: Efficiency and Impact on Family Livelihood, Food Security, and Environment Compared With Livestock and Crops	Insects as Sustainable Food Ingredients: Production, Processing and Food Applications	2016	Gahukar R.T.		YES						Maharashtra	Elsevier	10.1016/B978-0-12-802856-8.00004-1
168	Determination of fatty acid content in some edible insects of Mexico	Journal of Insects as Food and Feed	2016	Pino Moreno J.M.; Ganguly A.	YES							West Bengal	Wageningen Academic Publishers	10.3920/jiff2015.0078
169	Insects as human food	Economic and Ecological Significance of Arthropods in Diversified Ecosystems: Sustaining Regulatory Mechanisms	2016	Chakravarthy A.K.; Jayasimha G.T.; Rachana R.R.; Rohini G.							YES (Book chapter)	Karnataka	Springer Singapore	10.1007/978-981-10-1524-3_7
170	Utility of arthropods by indigenous communities: Sustaining natural resources	Economic and Ecological Significance of Arthropods in Diversified Ecosystems: Sustaining Regulatory Mechanisms	2016	Jayashankar M.; Charles M.; Arya V.V.; Hegde J.							YES (Book chapter)	Karnataka	Springer Singapore	10.1007/978-981-10-1524-3_6
171	Reducing the global environmental impact of livestock production: The minilivestock option	Journal of Cleaner Production	2016	Tabassum-Abbasi; Abbasi T.; Abbasi S.A.		YES						Tamil Nadu	Elsevier Ltd	10.1016/j.jclepro.2015.02.094
172	Entomophytophagy ('sequential predatory, then phytophagous behaviour') in an Indian braconid 'parasitoid' wasp (Hymenoptera): Specialized larval morphology, biology and description of a new species	PLoS ONE	2016	Ranjith A.P.; Quicke D.L.J.; Saleem U.K.A.; Butcher B.A.; Zaldívar-Riverón A.; Nasser M.			YES					Kerala	Public Library of Science	10.1371/journal.pone.0156997
173	Nutritional Composition of Five Soil-Dwelling Scarab Beetles (Coleoptera: Scarabaeidae) of Assam, India	Coleopterists Bulletin	2018	Bhattacharyya B.; Choudhury B.; Das P.; Dutta S.K.; Bhagawati S.; Pathak K.	YES							Assam	Coleopterists Society	10.1649/0010-065X-72.2.339
174	VESPA BASALIS: AN EDIBLE INSECT IN UKHRUL DISTRICT, MANIPUR	Indian Journal of Entomology	2019	Lokeshwari R.K.; Singh O.L.			YES					Manipur	The Entomological Society of India	10.5958/0974-8172.2019.00106.8
175	Characterization of a Newly Isolated Probiotic Strain from Oecophylla smaragdina, an Edible Insect Popular Among the Indigenous Communities of Northeast India	Indian Journal of Microbiology	2019	Borah D.; Gogoi P.; Agarwal D.; Khataniar A.				YES				Assam	Springer	10.1007/s12088-018-0758-5
176	Blockchain Eco-System for Thai Insect Industry: A Smart Contract Conceptual Framework	International Symposium on Wireless Personal Multimedia Communications, WPMC	2019	Jintapitak M.; Ansari M.A.; Kamyod C.; Singkhamfu W.; Kamthe N.S.; Temdee P.						YES		Maharashtra	IEEE Computer Society	10.1109/WPMC48795.2019.9096209
177	Present and future prospects on nutritious feeding using insects	Natural Materials and Products from Insects: Chemistry and Applications	2020	Yusuf M.							YES (Book chapter)	Haryana	Springer International Publishing	10.1007/978-3-030-36610-0_7
178	Industrial rearing of edible insects could be a major source of new biological invasions	Ecology Letters	2021	Bang A.; Courchamp F.						YES		Maharashtra	Blackwell Publishing Ltd	10.1111/ele.13646
179	A preliminary study on the juvenile stages of Tenebrio molitor Linnaeus, 1758 (Coleoptera: Tenebrionidae) and Sphenarium purpurascens Charpentier, 1842 (Orthoptera: Pyrgomorphidae) as exploitable nutraceutical resources	International Journal of Tropical Insect Science	2021	Ganguly A.; Moreno J.M.P.	YES							West Bengal	Springer Science and Business Media Deutschland GmbH	10.1007/s42690-021-00477-9
180	Future prospects of insects as a biological resource in India: Potential biological products utilizing insects with reference to the frontier countries.	Entomological Research, 51(5), 209-229.	2021	Ghosh, S., Gahukar, R. T., Meyer Rochow, V. B., & Jung, C.		YES						Maharashtra	Wiley Online	https://doi.org/10.1111/1748-5967.12507
181	INSECTS AS A VIABLE SOURCE OF PROTEINS-A REVIEW	Indian Journal of Entomology	2021	Balakamatchi T.; Sethuraman P.		YES						Tamil Nadu	The Entomological Society of India	10.5958/0974-8172.2021.00017.1
182	Chemical composition, nutrient quality and acceptability of edible insects are affected by species, developmental stage, gender, diet, and processing method	Foods	2021	Meyer-Rochow V.B.; Gahukar R.T.; Ghosh S.; Jung C.		YES						Maharashtra	MDPI AG	10.3390/foods10051036
183	Edible insects and gut health	Nutrition and Functional Foods in Boosting Digestion, Metabolism and Immune Health	2021	Anusha S.; Negi P.S.							YES-BOOK CHAPTER	Karnataka	Elsevier	10.1016/B978-0-12-821232-5.00015-X
184	Can edible insects complement conventional livestock? The desirability of insect nutrition for food security of a world heritage site and biosphere reserve	Current Nutrition and Food Science	2021	Hazarika A.K.; Kalita U.; Khanna S.	YES							Assam	Bentham Science Publishers	10.2174/1573401316999201102214119
185	Characterization of chitin content extracted from edible insect, Coridius nepalensis (Westwood, 1837) (Hemiptera: Dinidoridae)	International Journal of Tropical Insect Science	2021	Sharbidre A.; Sargar S.; Gogoi H.; Patil R.				YES				Arunachal Pradesh	Springer Science and Business Media Deutschland GmbH	10.1007/s42690-020-00386-3
186	Potential of edible insects as source of functional foods: biotechnological approaches for improving functionality	Systems Microbiology and Biomanufacturing	2022	Devi W.D.; Bonysana R.; Kapesa K.; Rai A.K.; Mukherjee P.K.; Rajashekar Y.		YES						Manipur	Springer	10.1007/s43393-022-00089-5
187	Traditional rearing techniques of the edible Asian giant hornet (Vespa mandarinia Smith) and its socio-economic perspective in Nagaland, India	Journal of Insects as Food and Feed	2022	Kiewhuo P.; Mozhui L.; Kakati L.N.; Lirikum; Meyer-Rochow V.B.				YES				Nagaland	Wageningen Academic Publishers	10.3920/JIFF2021.0088
188	EDIBLE INSECTS AND THEIR FOOD PLANTS IN NAGALAND-FUTURE PROSPECTS	Indian Journal of Entomology	2022	Mozhui L.; Kakati L.N.; Lea N.			YES					Nagaland	The Entomological Society of India	10.55446/IJE.2021.109
189	Diversity and acceptance of insect mini-livestock among the indigenous people of Laos PDR: traditional knowledge, culinary, and bioprospecting	Indigenous People and Nature: Insights for Social, Ecological, and Technological Sustainability	2022	Chouangthavy B.; Das A.			YES					West Bengal	Elsevier	10.1016/B978-0-323-91603-5.00026-9
190	Insects as Service Providers	Insects as Service Providers	2022	Omkar							YES (BOOK)	Uttar Pradesh	Springer Nature	10.1007/978-981-19-3406-3
191	Consumer acceptance of new food trends resulting from the fourth industrial revolution technologies: A narrative review of literature and future perspectives	Frontiers in Nutrition	2022	Hassoun A.; Cropotova J.; Trif M.; Rusu A.V.; Bobiş O.; Nayik G.A.; Jagdale Y.D.; Saeed F.; Afzaal M.; Mostashari P.; Khaneghah A.M.; Regenstein J.M.		YES						Jammu & Kashmir	Frontiers Media S.A.	10.3389/fnut.2022.972154
192	Food-On-A-Chip: Relevance of Microfluidics in Food Processing	Food Engineering Series	2022	Giri Nandagopal M.S.; Krishnamurthy S.; Venkatesh T.							YES (Book chapter)	West Bengal	Springer	10.1007/978-3-030-92415-7_22
193	Taxonomic analysis of some forest insects used in the diets in Mexican rural areas: Evaluation and perspectives	Journal of Insects as Food and Feed	2022	Pino Moreno J.M.; Ganguly A.; Reyes-Prado H.		YES						West Bengal	Wageningen Academic Publishers	10.3920/JIFF2020.0099
194	Insect Tourism	Insects as Service Providers	2022	Kanaujia A.; Kumar A.; Rai S.							YES (Book chapter)	Uttar Pradesh	Springer Nature	10.1007/978-981-19-3406-3_10
195	Insects for food, feed, pharmaceuticals and therapy: need for development	Current Science	2022	Shrivastava S.K.						YES		Chhattisgarh	Indian Academy of Sciences	https://www.currentscience.ac.in/Volumes/123/05/0623.pdf
196	Legal situation and consumer acceptance of insects being eaten as human food in different nations across the world–A comprehensive review	Comprehensive Reviews in Food Science and Food Safety	2023	Siddiqui S.A.; Tettey E.; Yunusa B.M.; Ngah N.; Debrah S.K.; Yang X.; Fernando I.; Povetkin S.N.; Shah M.A.		YES						Telangana	John Wiley and Sons Inc	10.1111/1541-4337.13243
197	3D Printing, Insects and Food: A Bibliometric Analysis	3D Printing of Sustainable Insect Materials	2023	Singh D.				YES				Punjab	Springer International Publishing	10.1007/978-3-031-25994-4_8
198	A common edible insect (Antheraea assamensis) protein hydrolysate regulates LPS-induced oxidative stress and inflammation by modulating the TLR4/NF-κβ Signaling Pathway	Journal of Insects as Food and Feed	2023	Sahu R.K.; Borthakur S.; Saikia M.; Sarkar S.; Ahmed R.S.; Dasgupta D.; Dhakal R.; Mech S.; Manna P.; Dutta P.; Kalita J.				YES				Assam	Brill Wageningen Academic	10.1163/23524588-00001012
199	Potential Alternatives of Animal Proteins for Sustainability in the Food Sector	Food Reviews International	2023	Kumar P.; Mehta N.; Abubakar A.A.; Verma A.K.; Kaka U.; Sharma N.; Sazili A.Q.; Pateiro M.; Kumar M.; Lorenzo J.M.		YES						Punjab	Taylor and Francis Ltd.	10.1080/87559129.2022.2094403
200	Extrusion-Based 3D Printing Concept in Customized Nutritional Products	3D Printing of Sustainable Insect Materials	2023	Kour K.; Kumar R.							YES (Book chapter)	Punjab	Springer International Publishing	10.1007/978-3-031-25994-4_10
201	Metabolomic screening for therapeutic potential in Mimela sp., an edible insect of the Arunachal Pradesh region	Journal of Environmental Biology	2023	Tukshipa S.; Muni N.; Prveen; Chakravorty J.				YES				Arunachal Pradesh	Triveni Enterprises	10.22438/jeb/44/5/MRN-5118
202	Inkjet-Based 3D Food Printing for Sustainable Insect Materials: A State- of- the-Art Review and Prospective Materials	3D Printing of Sustainable Insect Materials	2023	Badogu K.; Kumar R.							YES (Book chapter)	Punjab	Springer International Publishing	10.1007/978-3-031-25994-4_9
203	Entomophagy in 3D Food Printing	3D Printing of Sustainable Insect Materials	2023	Priya; Kumar R.							YES (Book chapter)	Punjab	Springer International Publishing	10.1007/978-3-031-25994-4_1
204	Social, Economic, Scientific and Environment Aspects of Entomophagy in 3D Food Printing	3D Printing of Sustainable Insect Materials	2023	Badogu K.; Kour K.; Kumar R.							YES (Book chapter)	Punjab	Springer International Publishing	10.1007/978-3-031-25994-4_12
205	Diversity of edible insects in Tuensang District, Nagaland, India	Entomon	2023	Phom C.; Somasundaram J.			YES					Nagaland	Association for Advancement of Entomology	10.33307/entomon/v48i3/952
206	Edible Insects as Materials for Food Printing: Printability and Nutritional Value	3D Printing of Sustainable Insect Materials	2023	Singh H.; Shikuku V.							YES (Book chapter)	Punjab	Springer International Publishing	10.1007/978-3-031-25994-4_6
207	Edible Lepidoptera as human foods – a comprehensive review	Journal of Insects as Food and Feed	2023	Siddiqui S.A.; Ngah N.; Eddy-Doh A.M.; Ucak I.; Afreen M.; Fernando I.; Singh S.; Shah M.A.; Povetkin S.N.; Castro-Muñoz R.		YES						Punjab	Brill Wageningen Academic	10.1163/23524588-20230072
208	Insects Nutrition and 3D Printing	3D Printing of Sustainable Insect Materials	2023	Priya; Kumar R.							YES (Book chapter)	Punjab	Springer International Publishing	10.1007/978-3-031-25994-4_4
209	Bioactive compounds of insects for food use: Potentialities and risks	Journal of Agriculture and Food Research	2023	Rivas-Navia D.M.; Dueñas-Rivadeneira A.A.; Dueñas-Rivadeneira J.P.; Aransiola S.A.; Maddela N.R.; Prasad R.		YES						Bihar	Elsevier B.V.	10.1016/j.jafr.2023.100807
210	LC-MS/MS Targeted Amino Acid Profiling of Edible Beetle Anomala sp. and Its Host Plants	Current Research in Nutrition and Food Science	2023	Muni N.; Prveen; Rajashekar Y.; Chakravorty J.				YES				Arunachal Pradesh	Enviro Research Publishers	10.12944/CRNFSJ.11.3.23
211	Termites as human foods—A comprehensive review	Comprehensive Reviews in Food Science and Food Safety	2023	Siddiqui S.A.; Fernando I.; Saraswati Y.R.; Rahayu T.; Harahap I.A.; Yao Q.; Nagdalian A.; Blinov A.; Shah M.A.		YES						Telangana	John Wiley and Sons Inc	10.1111/1541-4337.13199
212	Entomophagy and Its Application Through 3D Printing for Sustainable Food Development	3D Printing of Sustainable Insect Materials	2023	Seram D.; Haobijam J.W.; Morya S.							YES (Book chapter)	Punjab	Springer International Publishing	10.1007/978-3-031-25994-4_2
213	Understanding the role of insects in the acquisition and transmission of antibiotic resistance	Science of the Total Environment	2023	Rawat N.; Anjali; Shreyata; Sabu B.; Jamwal R.; Devi P.P.; Yadav K.; Raina H.S.; Rajagopal R.		YES						Delhi	Elsevier B.V.	10.1016/j.scitotenv.2022.159805
214	A Review on Binder Jetting and Selective Laser Sintering: A Novel Assessment of the Processes for 3D Insect Food Printing Materials	3D Printing of Sustainable Insect Materials	2023	Farooq S.; Ranjan N.							YES (Book chapter)	Punjab	Springer International Publishing	10.1007/978-3-031-25994-4_11
215	Gelatin alternative: extractability and functional and bioactivity properties	Natural Gums: Extraction, Properties, and Applications	2023	Rosli N.S.M.; Ahmed S.; Sarbon N.M.							YES (Book chapter)	Jammu & Kashmir	Elsevier	10.1016/B978-0-323-99468-2.00019-X
216	Edible insects as innovative ingredients: processing technologies and insect incorporated foods	Journal of Insects as Food and Feed	2023	Anusha S.; Negi P.S.		YES						Uttar Pradesh	Wageningen Academic Publishers	10.3920/JIFF2022.0026
217	Entomophagy: Application of Edible Insects in 3D Printed Foods	3D Printing of Sustainable Insect Materials	2023	Morya S.; Sandhu D.; Thakur A.; Neumann A.; Awuchi C.G.							YES (Book chapter)	Punjab	Springer International Publishing	10.1007/978-3-031-25994-4_5
218	Traditional knowledge of pest management and entomophagy: perspective on kiwi crop management by the Apatani tribe of Arunachal Pradesh, North East India	Current Science	2023	Muni N.; Rajashekar Y.; Chakravorty J.			YES					Arunachal Pradesh	Indian Academy of Sciences	10.18520/cs/v124/i12/1473-1475
219	3D Printing of Sustainable Insect Materials	3D Printing of Sustainable Insect Materials	2023	Singh D.; Singh S.; Kumar R.; Ramniwas S.							YES (Book)	Chandigarh	Springer International Publishing	10.1007/978-3-031-25994-4
	*EXCEPTIONAL : Publications of foreign authors who studied entomophagy in India
	*NA: Not Available
